Corticospinal correlates of hand preference in motion

1 **Corticospinal correlates of hand preference for reaching during whole-**  
2 **body motion**

3

4 **Leonie Oostwoud Wijdenes<sup>1</sup>, Syanah C. Wynn<sup>1,2,3</sup>, Béla S. Roesink<sup>1</sup>, Dennis J.L.G.**  
5 **Schutter<sup>1,4</sup>, Luc P.J. Selen<sup>1</sup> & W. Pieter Medendorp<sup>1</sup>**

6 <sup>1</sup>Radboud University, Donders Institute for Brain, Cognition and Behaviour, Nijmegen,

7 The Netherlands; <sup>2</sup>Department of Psychology, Bowdoin College, Brunswick, ME, United

8 States; <sup>3</sup>Program in Neuroscience, Bowdoin College, Brunswick, ME, United States

9 <sup>4</sup>Experimental Psychology, Helmholtz Institute, Utrecht University, Utrecht, The

10 Netherlands

11

12 Corresponding author: Leonie Oostwoud Wijdenes, Radboud University, Donders

13 Institute for Brain, Cognition and Behaviour, Box 9104, 6500 HE Nijmegen,

14 [l.oostwoudwijdenes@donders.ru.nl](mailto:l.oostwoudwijdenes@donders.ru.nl)

15

16 ***Authors Contributions***

17 LOW, BSR, DJLGS, LPJS and WPM conception and design of research; LOW, SCW, BSR

18 and LPJS performed experiments; LOW and LPJS analyzed data; LOW, LPJS and WPM

19 interpreted results of experiments; LOW prepared figures; LOW drafted manuscript;

20 LOW, SCW, BSR, DJLGS, LPJS and WPM edited and revised manuscript; LOW, SCW, BSR,

21 DJLGS, LPJS and WPM approved final version of manuscript.

22

## Corticospinal correlates of hand preference in motion

### 23 **Abstract**

24 Behavioral studies have shown that humans account for inertial acceleration in their  
25 decisions of hand choice when reaching during body motion. Physiologically, it is unclear  
26 at what stage of movement preparation information about body motion is integrated in  
27 the process of hand selection. Here, we addressed this question by applying transcranial  
28 magnetic stimulation over motor cortex (M1) of human participants who performed a  
29 preferential reach task while they were sinusoidally translated on a linear motion  
30 platform. If M1 only represents a read-out of the final hand choice, we expect the body  
31 motion not to affect the MEP amplitude. If body motion biases the hand selection process  
32 prior to target onset, we expect corticospinal excitability to modulate with the phase of  
33 the motion, with larger MEP amplitudes for phases that show a bias to using the right  
34 hand. Behavioral results replicate our earlier findings of a sinusoidal modulation of hand  
35 choice bias with motion phase. MEP amplitudes also show a sinusoidal modulation with  
36 motion phase, suggesting that body motion influences corticospinal excitability which  
37 may ultimately reflect changes of hand preference. The modulation being present prior  
38 to target onset suggests that competition between hands is represented throughout the  
39 corticospinal tract. Its phase relationship with the motion profile suggests that other  
40 processes after target onset take up time until the hand selection process has been  
41 completely resolved, and the reach is initiated. We conclude that the corticospinal  
42 correlates of hand preference are modulated by body motion.

43

### 44 **Keywords**

45 Hand choice, vestibular system, self-motion, motor control, corticospinal excitability

46

## Corticospinal correlates of hand preference in motion

47 We frequently encounter tasks that can be performed with either hand, for example  
48 moving papers on a desk, picking up a key from the table, or opening a door. Whether  
49 we use our left or right hand is known to depend on various factors, including  
50 handedness, recent choice success, and eye and head position (Bakker et al. 2018;  
51 Schweighofer et al. 2015; Stoloff et al. 2011). Biomechanical factors also play a role:  
52 participants prefer to move the hand that is closest to the target (Mamolo et al. 2004;  
53 Przybyła et al. 2013) and for two equidistant targets participants choose to move to the  
54 target that can be reached with the lowest biomechanical cost (Cos et al. 2011, 2014).

55 Recently, Bakker et al. (2017, 2019) studied hand choice when participants are  
56 in motion. In such a dynamic situation, not only vision and proprioception provide  
57 information about the state of the body and the environment, also information about  
58 whole body motion is registered by the vestibular organ (Angelaki and Cullen 2008).  
59 Full-body acceleration differentially modulates the biomechanical costs of left and right-  
60 hand movements and consequently hand preferences are modulated by the current  
61 dynamic situation (Bakker et al. 2017, 2019). The physiological basis of this motion  
62 related modulation of hand preference is unknown.

63 It has been proposed that decision making and movement generation processes  
64 are tightly connected in the sensorimotor areas of the brain (Cisek 2007; Cisek and  
65 Kalaska 2010). For hand selection, this implies that motor plan for both hands are  
66 generated in parallel, while these two plans compete for execution. It is unclear at what  
67 level this competition between the two motor plans is resolved.

68 On the one hand, studies suggest that competition for hand selection is resolved  
69 before movement preparation reaches dorsal premotor cortex (PMd), possibly in  
70 parietal cortex (Bernier et al. 2012; Dekleva et al. 2018; Oliveira et al. 2010). On the  
71 other hand, it has been observed that areas closer to movement execution, up to  
72 primary motor cortex (M1), represent evidence for multiple concurrent movements  
73 (Cisek and Kalaska 2005; Dekleva et al. 2016; Derosiere et al. 2019; Thura and Cisek  
74 2014).

75 Transcranial magnetic stimulation (TMS) over the motor cortex can be used to  
76 obtain a non-invasive physiological read-out of the state of corticospinal excitability, as  
77 evaluated by electromyographic recordings of the motor-evoked potential (MEP)  
78 (Bestmann and Krakauer 2015). In preferential reaching tasks, corticospinal excitability  
79 is enhanced for the selected hand, while it is suppressed for the non-selected hand

## Corticospinal correlates of hand preference in motion

80 (Duque et al. 2010; Duque and Ivry 2009; Klein-Flügge et al. 2013; Klein-Flügge and  
81 Bestmann 2012). Here we examine if M1 represents the modulation of hand preference  
82 with full-body motion by applying a single TMS pulse over M1 to quantify corticospinal  
83 excitability at the moment a reach target would have been presented. In this way, we  
84 learn how full-body motion affects hand preference.

85 We hypothesized that if M1 only represents a read-out of an already made  
86 decision for which the competition was resolved in upstream areas, corticospinal  
87 excitability would not be modulated by the whole-body motion if no target is presented.  
88 However, if body motion affects hand preference prior to target onset, we expected  
89 corticospinal excitability to modulate dependent on the whole-body motion, even  
90 before a target is presented. Corticospinal excitability was indexed by the MEP  
91 amplitude of the contralateral lateral triceps muscle.

92

### 93 **Methods**

#### 94 *Participants*

95 20 self-reported right-handed participants (15 females) aged 19-47 years old  
96 (mean age 25 years) took part in this study, consisting of an intake session and two  
97 experimental sessions. Participants had normal or corrected-to-normal visual acuity,  
98 and had no history or presence of neurological or psychiatric disorders by self-report.  
99 Due to technical problems, data of one female participant had to be discarded.

100 Participants received written and verbal information about the study prior to providing  
101 written informed consent, whereby they remained naïve as to the research question.

102 Participants refrained from taking psychotropic substances within two hours prior to  
103 experimentation and from taking alcohol within 24 hours prior to experimentation.

104 This study was approved by the medical research ethics committee of the Radboud  
105 University Medical Center Nijmegen (NL59818.091.16).

106

#### 107 *Apparatus*

108 Participants were seated on a vestibular sled in a darkened room (Figure 1A).

109 The sled was powered by a linear motor (TB15N; Technotion, Almelo, The Netherlands)  
110 and controlled by a Kollmorgen S700 drive (Danaher, Washington, DC, USA).

111 Participants were securely fastened with a five-point seat belt. Their head was

112 immobilized with a personalized thermoplastic mask (Posicast). Visual stimuli were

## Corticospinal correlates of hand preference in motion

113 presented on a 27-inch touch screen which also registered touch of the two index  
114 fingers (ProLite; Iiyama, Tokyo, Japan). The position of both index finger tips and the  
115 sled were measured at 500 Hz using an Optotrak Certus system (Northern Digital,  
116 Waterloo, Canada). Electromyographic activity of six right arm muscles was recorded  
117 using a Trigno Wireless EMG system (Delsys, Boston, USA): first dorsal interosseous,  
118 brachioradialis, biceps long head, biceps short head, triceps lateral head (TLAT) and  
119 triceps long head. EMG data were band-pass filtered (30-450 Hz), amplified (1000) and  
120 sampled at 1111 Hz.

121 For the MEP measurements we targeted the TLAT muscle, as this is the primary  
122 actor of the reaching movement. To elicit MEPs, a figure-of-8 coil (Cool-B65,  
123 MagVenture A/S) was placed over left M1 to target the right arm TLAT. The coil was  
124 oriented posterolaterally at an angle of  $\sim 45^\circ$  to the midline and fixed to the sled. The  
125 coil was securely fastened to the sled. Together with the mask this configuration  
126 ensured that there was minimal motion between the coil and the head within a session.  
127 Stimulation parameters were in agreement with the International Federation of Clinical  
128 Neurophysiology safety guidelines (Rossi et al. 2009). There were no serious adverse  
129 events and participants had no issues tolerating the TMS. Since TLAT is the primary  
130 actor of the reaching movement and this was the targeted muscle, only data from TLAT  
131 will be reported.

132

### 133 *Experiment*

134 The intake session and two experimental sessions took place at different days  
135 and all started with localizing the right arm TLAT hotspot and determining the resting  
136 motor threshold for this muscle (Schutter and van Honk 2006). If we could not elicit a  
137 MEP at a stimulation intensity 83% (as a percentage of the maximum machine output),  
138 or if the participant did not feel comfortable with the experimental setup, volunteers  
139 were not invited to take part in the experimental sessions. Therefore, we saw about  
140 three times as many volunteers in the intake session than volunteers who took part in  
141 the full experiment. The mean resting motor thresholds in the experimental sessions of  
142 the participants who completed the experiment was 70.2% ( $SD = 11.3$ ) of the maximum  
143 machine output. These relatively high motor thresholds are probably related to the  
144 targeted muscle. After the resting motor threshold was determined in the intake

## Corticospinal correlates of hand preference in motion

145 session, participants were familiarized with the experimental setup and fitted with the  
146 personalized head mask.

147         During the experimental sessions, the sled translated in a sinusoidal fashion  
148 along the interaural axis with an amplitude of 0.15 m and a period of 1.6 s (Figure 1B),  
149 resulting in a peak velocity of 0.59 m/s and peak acceleration of 2.3 m/s<sup>2</sup>. While in  
150 motion, participants looked at a fixation cross and triggered the start of each trial by  
151 placing their left and right index fingers on the starting points (red circles, 3.5 cm  
152 diameter; Figure 1C). There were three types of trials: choice trials, catch trials and TMS  
153 trials (Figure 1C). In choice trials, a target was presented (yellow circle, 3.5 cm  
154 diameter) at one of eight phases of the whole-body motion (grey circles in Figure 1B).  
155 Targets appeared within 5° of the intended phase of sled motion. In 75% of the trials,  
156 the direction of the presented target was determined by a Bayesian adaptive approach  
157 in order to find the target angle for which participants were equally likely to choose  
158 their left and right hand (Kontsevich and Tyler 1999; Prins 2013), whereby possible  
159 angles were -40°, -35°, -30° to 30° with steps of 2°, 35° and 40°. In the other 25% of  
160 trials, a peripheral target (-40°, -35°, -30°:2:-22°, 22°:2:30°, 35°, or 40°) was presented,  
161 enabling an estimate of the full psychometric curve after data collection. The adaptive  
162 estimation was run for each phase of motion separately. Participants were instructed to  
163 hit the target as quickly and accurately as possible with either their left or their right  
164 index finger. In catch trials, to avoid pre-determined hand choices, two targets were  
165 presented and participants were instructed to hit both targets with their left and right  
166 index fingers.

167         In TMS trials, a single TMS pulse (~ 1 ms) at 120% of the participants' resting  
168 motor threshold was delivered at one of eight phases of motion (grey circles in Figure  
169 1B). Thus, the pulse was delivered at the time a target would have been presented in a  
170 choice trial, but the target remained absent in the TMS trials. After a TMS trial, there  
171 was a 3 s break and participants were asked to lift their fingers and replace them at the  
172 start locations. Trial type was pseudo-randomized whereby there were at least three  
173 other trials in between successive TMS or catch trials. Per session participants  
174 performed 6 blocks of 120 trials with short breaks in between the blocks. Each block  
175 consisted of 96 choice, 16 TMS and 8 catch trials, resulting in a total of 1440 trials per  
176 participant. Per phase of motion there were 24 TMS trials. One experimental session

## Corticospinal correlates of hand preference in motion

177 tested at the phases of sled motion  $0, \frac{1}{2}\pi, \pi$  and  $1\frac{1}{2}\pi$ , and the other session tested at  $\frac{1}{4}\pi, \frac{3}{4}\pi,$   
178  $1\frac{1}{4}\pi$  and  $1\frac{3}{4}\pi$ . The order was counterbalanced across participants.

179

### 180 *Analyses*

181 Hand choice was determined by the first index finger leaving the touch screen, as  
182 registered online by the screen. Optotrak data confirmed the choices determined based  
183 on touch screen data. For each sled phase, the target angle for which participants were  
184 equally likely to choose their left and right hand was estimated by a cumulative  
185 Gaussian distribution fit using a maximum likelihood approach with a lapse rate  
186 (Wichmann and Hill 2001):

$$187 \quad P(x) = \lambda + (1 - 2\lambda) \frac{1}{\sigma\sqrt{2\pi}} \int_{-\infty}^x e^{-(y-\mu)^2/2\sigma^2} dy \quad (1)$$

188 Here,  $x$  represents the target angle,  $\mu$  represents the target angle for which participants  
189 were equally likely to choose their left and right hand, i.e. the point of subjective  
190 equality (PSE),  $\sigma$  represents the standard deviation of the choice distribution and  $\lambda$   
191 represents the lapse rate.

192 Based on Bakker et al. (2017), PSE was expected to modulate with phase (Figure  
193 1D; green). To determine the phase modulation of the sled on the PSE, two sinusoids  
194 with a coupled phase ( $\theta_{PSE}$ ) and two independent amplitudes (A1 and A2) and offsets  
195 (B1 and B2) were fit to each participants PSEs of the two sessions:

$$196 \quad PSE_{phase\ 0, \frac{1}{2}\pi, \pi, 1\frac{1}{2}\pi} = A1 \times \sin\left(sled_{phase\ 0, \frac{1}{2}\pi, \pi, 1\frac{1}{2}\pi} - \theta_{PSE}\right) + B1 \quad (2)$$

$$197 \quad PSE_{phase\ \frac{1}{4}\pi, \frac{3}{4}\pi, 1\frac{1}{4}\pi, 1\frac{3}{4}\pi} = A2 \times \sin\left(sled_{phase\ \frac{1}{4}\pi, \frac{3}{4}\pi, 1\frac{1}{4}\pi, 1\frac{3}{4}\pi} - \theta_{PSE}\right) + B2$$

198 This ensured that differences in amplitude and offset, that may occur due to two  
199 different testing days, were accounted for.

200 Corticospinal excitability was determined by measuring the MEP amplitude  
201 caused by the single pulse TMS. For each trial, the difference between the maximum and  
202 minimum EMG activity in TLAT 15-35 ms after the TMS pulse was calculated (Cos et al.  
203 2014). Trials were excluded if the maximum EMG activity in a window 200 ms before  
204 the TMS pulse exceeded 0.1 mV (Klein-Flügge and Bestmann 2012), if the trigger was  
205 missing or if sensor connection was lost. The trigger happened to be missing in one full  
206 session of participant 11. Of all other trials of all participants 9% was excluded. MEP  
207 was determined as the mean potential per participant per phase.

## Cortical correlates of hand preference in motion

208 Similar to the hand choice data, to account for differences between the sessions  
 209 in absolute stimulation intensity, MEP amplitude and offset, two sinusoids with a  
 210 coupled phase ( $\theta_{MEP}$ ) and two independent amplitudes (C1 and C2) and offsets (D1 and  
 211 D2) were fit to each participants MEPs of the two sessions:

$$212 \quad MEP_{phase\ 0, \frac{1}{2}\pi, \pi, 1\frac{1}{2}\pi} = C1 \times \sin\left(sled_{phase\ 0, \frac{1}{2}\pi, \pi, 1\frac{1}{2}\pi} - \theta_{MEP}\right) + D1 \quad (3)$$

$$213 \quad MEP_{phase\ \frac{1}{4}\pi, \frac{3}{4}\pi, 1\frac{1}{4}\pi, 1\frac{3}{4}\pi} = C2 \times \sin\left(sled_{phase\ \frac{1}{4}\pi, \frac{3}{4}\pi, 1\frac{1}{4}\pi, 1\frac{3}{4}\pi} - \theta_{MEP}\right) + D2$$

214 Since MEP is a noisy measure, the sinusoid fits were also performed on all single trial  
 215 MEPs per participant instead of on the mean MEP per phase per participant. Also, a  
 216 single sinusoid phase was fit to all participants mean MEPs with session and participant  
 217 dependent amplitudes and offsets. All of these fits resulted in a similar estimation of the  
 218 mean phase, suggesting that the measure is robust. Therefore, we only report results of  
 219 the individual fits to the mean MEPs.

220 To test if there was a sinusoidal modulation of the PSEs and MEPs, or if a  
 221 constant offset per session could better explain the behavioral and physiological data  
 222 (see Figure 1D), a constant model was also fit to the data of each participant:

$$223 \quad PSE_{phase\ 0, \frac{1}{2}\pi, \pi, 1\frac{1}{2}\pi} = mean(PSE_{phase\ 0, \frac{1}{2}\pi, \pi, 1\frac{1}{2}\pi}) \quad (4)$$

$$224 \quad PSE_{phase\ \frac{1}{4}\pi, \frac{3}{4}\pi, 1\frac{1}{4}\pi, 1\frac{3}{4}\pi} = mean(PSE_{phase\ \frac{1}{4}\pi, \frac{3}{4}\pi, 1\frac{1}{4}\pi, 1\frac{3}{4}\pi}) \quad (5)$$

$$225 \quad MEP_{phase\ 0, \frac{1}{2}\pi, \pi, 1\frac{1}{2}\pi} = mean(MEP_{phase\ 0, \frac{1}{2}\pi, \pi, 1\frac{1}{2}\pi}) \quad (6)$$

$$226 \quad MEP_{phase\ \frac{1}{4}\pi, \frac{3}{4}\pi, 1\frac{1}{4}\pi, 1\frac{3}{4}\pi} = mean(MEP_{phase\ \frac{1}{4}\pi, \frac{3}{4}\pi, 1\frac{1}{4}\pi, 1\frac{3}{4}\pi}) \quad (7)$$

227 For every participant, the fits of the two models were compared by computing the  
 228 Bayesian Information Criterion (BIC), which accounts for the difference in the number  
 229 of parameters:

$$230 \quad BIC = N \cdot \ln(\sigma_e^2) + k \cdot \ln(N) \quad (8)$$

231 where  $N$  is the number of fitted data points,  $\sigma_e^2$  is the mean squared error of the fit and  
 232  $k$  is the number of model parameters, i.e. 1 for the constant model and 3 for the sinusoid  
 233 model. The BIC value is smaller if the model has fewer parameters and hence provides a  
 234 more parsimonious description of the data. To compare the two models a difference  
 235 value was computed:

$$236 \quad \Delta BIC = BIC_{constant} - BIC_{sinusoid} \quad (9)$$



## Corticospinal correlates of hand preference in motion

237 A BIC value difference of 2-6 indicates positive evidence for the model with the lower  
238 value, 6-10 indicates strong evidence and >10 very strong evidence (Kass and Raftery  
239 1995).

240 Since MEPs were induced by stimulating left M1, we expected that MEPs would  
241 be enhanced for phases where a right hand choice was more likely. Behaviorally, a more  
242 likely right hand choice corresponds to a PSE shift towards the left (Figure 1D, green). If  
243 the modulation of MEP is aligned with the presentation of the target, we therefore  
244 expect a  $\pi$  phase difference between PSE and MEP (Figure 1D, purple). However, the  
245 modulation of MEP may not be aligned with target presentation, because information  
246 about the target may take some time to process in the brain, i.e. nondecision time  
247 (Ratcliff and McKoon 2008). Maximally, this process would last as long as the reaction  
248 time, which is  $\sim 300$  ms in this task (Bakker et al. 2017). With a sled period of 1.6 s, this  
249 would result in a  $\frac{5}{8}\pi$  phase difference between PSE and MEP (Figure 1D, shaded purple).  
250 Thus, we hypothesize that the phase difference between PSE and MEP will be in  
251 between  $\frac{5}{8}\pi$  to  $\pi$  (Figure 1D). To test if there was a phase difference between PSE and  
252 MEP, we performed a Watson-Williams test (Berens 2009). To examine if the phase  
253 difference between PSE and MEP is in a congruent direction across participants we  
254 performed a correlation with a correction for circular data (Berens 2009).

255

### 256 **Results**

257 We investigated if corticospinal excitability before a target is presented reflects  
258 biases in hand preference induced by whole-body motion. In most trials, participants  
259 were free to choose with which hand they preferred to move to the target. Figure 2A  
260 shows hand choice behavior of participant 9, separately for the different sled phases.  
261 Cumulative Gaussian fits were used to estimate the target angle for which participants  
262 were equally likely to choose their left and right hand, i.e. the PSE, indicated by the  
263 vertical black line. Figure 2B shows the PSE as a function of the sled's motion phase at  
264 which the target was presented for the individual participants. Data from the two  
265 sessions are indicated by dark and light blue. To determine the phase relationship  
266 between sled motion and hand preference, the PSEs of each participant were fitted by  
267 two sinusoids with a single phase and session-dependent amplitudes and offsets (eq. 3).  
268 Consistent with previous work from our lab, the PSE was shifted mostly to the left, and  
269 thus indicating a preference for using the right hand, around maximum leftward

## Corticospinal correlates of hand preference in motion

270 acceleration, i.e. sled phase  $\frac{1}{2}\pi$ . Similarly, the PSE was shifted most strongly to the right  
271 around maximum rightward acceleration, i.e. sled phase  $\frac{1}{2}\pi$ , (Bakker et al. 2017, 2019).

272 To test if the PSE data is better represented by a sinusoid than by a constant  
273 offset, we calculated the difference in BIC between the two models, thereby accounting  
274 for the difference in number of free parameters. As illustrated in Figure 3, left panel, 16  
275 out of 19 participants show strong to very strong evidence ( $\Delta BIC > 6$ ) for a sinusoidal  
276 modulation, while no participant shows positive evidence for a constant offset ( $\Delta BIC < -$   
277 2). This again confirms that hand choice is modulated by sinusoidal body motion in a  
278 sinusoidal fashion. The modulation is thought to reflect the influence of bottom-up  
279 acceleration signals on hand choice (Bakker et al. 2017, 2019).

280 In selected trials a single TMS pulse was delivered. Figure 4A shows the mean  
281 TLAT EMG response (MEP) to this pulse for each sled phase for participant 9. Figure 4B  
282 shows the resulting MEP amplitudes as a function of sled phase for all participants.  
283 Compared to the PSEs, MEPs were more variable between sessions and between  
284 participants. As for the PSEs, a sinusoidal model with a single phase and session  
285 dependent amplitudes and offsets was fit to the MEPs for each participant (eq. 3).  
286 Across participants, the circular mean phase seems to peak around phase  $\pi$  (bottom  
287 right panel).

288 To test if the MEP data, similar to the PSE data, also support a sinusoidal model  
289 over a constant offset, the difference in BIC value between the two models was  
290 calculated (Figure 3, right panel). Here, 15 out of 19 participants show positive to very  
291 strong evidence ( $\Delta BIC > 2$ ) for a sinusoidal modulation, while no participant showed  
292 positive evidence for a constant offset ( $\Delta BIC < -2$ ). This suggests that the MEPs were  
293 modulated by the full body motion in a sinusoidal fashion.

294 We hypothesized that if corticospinal excitability reflects biases in hand  
295 preference, there would be a  $\frac{5}{8}\pi$  to  $\pi$  phase difference between the PSE and MEP phase  
296 (Figure 1D). Figure 5A shows a polar plot of the PSE and MEP phases for each  
297 participant. A Watson-Williams test indicated that there was a significant phase  
298 difference between PSE ( $M = 3.3$  rad) and MEP ( $M = 1.9$  rad) ( $F(1,36) = 11.97$ ;  $P =$   
299  $0.0014$ ). The difference between the mean phases is 1.4 rad.

300 Figure 5B shows the phase difference between PSE and MEP phase for each  
301 participant. Note that there is a discrepancy between the difference of the means (lines  
302 in Figure 5A) and the mean of the individual differences (line in Figure 5B) due to the

## Corticospinal correlates of hand preference in motion

303 circular nature of the data. A circular correlation indicated that the difference between  
304 PSE and MEP phase is consistent across participants ( $R = -0.5$ ,  $P = 0.0141$ ), with on  
305 average PSE phase leading MEP phase by 0.55 rad. Although both phase differences are  
306 in the expected direction, the difference seems to be just outside the hypothesized  
307 window.

308

### 309 **Discussion**

310 We examined if corticospinal excitability reflects hand choice preference due to  
311 whole-body motion before the hand is selected. Choice behaviour confirms previous  
312 observations from our lab: sinusoidal whole-body motion modulates hand choice bias.  
313 Specifically, the target for which both hands are equally likely to be selected shifts  
314 maximally to the left (indicating a preference for using the right hand) at maximum  
315 leftward body acceleration (Figure 2B), and maximally to the right at maximum  
316 rightward body acceleration (Bakker et al. 2017, 2019). Corticospinal excitability also  
317 modulates sinusoidally with body motion. Stimulation over left M1 resulted in  
318 maximum excitability around phase  $\pi$  (maximum leftward body velocity, Figure 4B).  
319 The sinusoidal modulation of corticospinal excitability suggests that biased competition  
320 between hands penetrates deeply within the motor system. This fits within a  
321 framework of multiple concurrently prepared actions, even before a target is presented  
322 (Cisek and Kalaska 2005; Derosiere et al. 2019; Thura and Cisek 2014).

323 The fact that both the hand choice bias and MEP amplitude are sinusoidally  
324 modulated by whole body motion, raises the question whether the MEP modulation is  
325 predictive to the hand preference. MEPs were elicited at the moment that otherwise a  
326 target would be presented. If hand preference is reflected in the corticospinal state at  
327 the moment of target presentation, we would have expected a phase difference between  
328 PSE and MEP of  $\pi$ : a maximum shift of the PSE to the left (negative) corresponds to a  
329 maximum MEP amplitude (Figure 1D). However, if behavioral choice is influenced by  
330 the corticospinal state somewhere in the reaction time window, the phase of the MEP  
331 modulation would shift further along the sled motion (to the right in Figure 1D; sled  
332 motion period is 1.6 s), resulting in a smaller phase difference between PSE and MEP.  
333 This MEP phase shift would maximally last as long as reaction time ( $\sim 300$  ms), resulting  
334 in a phase difference between PSE and MEP of  $\frac{5}{8}\pi$ . The mean phase difference that we  
335 found was even slightly smaller than the hypothesized window. This might suggest that

## Corticospinal correlates of hand preference in motion

336 hand preference is not fully predictable by corticospinal excitability before a target is  
337 presented.

338 It has been shown that vestibular information is taken into account in movement  
339 planning and online control of reaching movements. Vestibular stimulation by means of  
340 body rotation, or by means of artificial stimulation of the vestibular organ with galvanic  
341 stimulation which induces the illusion of a body rotation, results in corrections of the  
342 reaching movement to account for the perceived rotation (Bresciani et al. 2005; Keyser  
343 et al. 2017; Oostwoud Wijdenes et al. 2019; Reichenbach et al. 2016). Also, visuomotor  
344 feedback gains for online corrections are modulated by vestibular information  
345 (Oostwoud Wijdenes et al. 2019).

346 In hand choice tasks with a stationary body, biomechanical costs in terms of  
347 required effort have been shown to influence hand selection (Schweighofer et al. 2015).  
348 The relative effort associated with moving either arm changes continuously under  
349 whole body motion, which we have hypothesized might alter hand choice during  
350 passive body motion (Bakker et al. 2017). Bakker et al. (2017) found that a model that  
351 computes future movement effort based on a constant whole-body acceleration from  
352 the moment of target presentation, best describes the observed choice biases.  
353 Behaviorally we confirm previous results, but the phase shift between behavior and  
354 corticospinal excitability in the current study suggests that the exact moment at which a  
355 snapshot of the body acceleration is taken might be later than the moment of target  
356 presentation.

357 From previous work we know that reaching under whole body linear  
358 acceleration requires adaptation of an internal model (Sarwary et al. 2013), but we  
359 were unable to show signs of learning in choice behavior in the current paradigm  
360 (Bakker et al. 2017). This raises the question whether the modulation of the MEP with  
361 sled phase is developing over the course of the experiment or that this coupling is the  
362 result of a more direct modulation of body-motion related signals on the corticospinal  
363 tract. We tried to post-hoc examine the possibility of a development of the MEP  
364 amplitude due to learning by comparing the MEPs of the first half of the experiment to  
365 the second half, whereby MEP amplitude was computed for each half separately  
366 according to the methods applied to the full dataset. However, the small number of  
367 trials did not provide us with enough power to prove or disprove a change in MEP over

## Corticospinal correlates of hand preference in motion

368 the course of the experiment. Future research, with more TMS trials, might examine if  
369 corticospinal excitability slowly adapts as a function of the passive body motion.

370 The observed modulation in corticospinal excitability may find its origin in  
371 cortical areas related to hand selection and movement preparation, but also in the  
372 spinal part of the circuit (Bestmann and Krakauer 2015). Possibly postural responses  
373 anticipating the passive full-body motion modulated the MEP amplitude (Kazennikov et  
374 al. 2005). To minimize co-activation of antagonistic muscle pairs (Selen et al. 2005), our  
375 set-up was designed to enable a relaxed arm and body posture throughout the  
376 experiment. If TLAT was unexpectedly more active than during resting state, this trial  
377 was excluded. Also, if there would have been co-activation, one may expect that this  
378 would result in an overall increase of muscle tension, rather than the sinusoidal pattern  
379 observed here. Therefore, we believe that the observed modulation of corticospinal  
380 excitability with body motion is not related to increased tension in antagonistic  
381 muscles, but rather to the motion itself.

382 Alternatively, more global effects could have influenced corticospinal activity.  
383 For example, it has been reported that attentional focus (external versus internal)  
384 modulates MEPs evoked by motor cortex stimulation (Kuhn et al. 2018). Concurrent leg  
385 muscle activation results in a prolonged attenuation of EMG activity (i.e. cortical silent  
386 period) after TMS pulses targeting finger muscle abduction, while the MEP amplitude  
387 itself remained unaffected (Sohn et al. 2005). Bestmann et al. (Bestmann et al. 2008)  
388 demonstrated that uncertainty and surprise influence MEPs in a delayed-response task.  
389 Although our TMS pulses were applied over M1, the induced electric field could have  
390 resulted in stimulation of cortico-spinal, intra-cortical and trans-cortical neurons, with  
391 activation spreading throughout the cerebral cortex possibly increasing neural  
392 excitability (Bestmann and Krakauer 2015; Casula et al. 2018). We controlled for these  
393 effects by means of full body fixation, no target being present in the TMS trials and  
394 unpredictable stimuli presentation times.

395 We manipulated the state of the body with sinusoidal full-body motion. Since  
396 position, velocity and acceleration are inherently related for sinusoids, and the motion  
397 may be predictable, it is difficult to conclude what information participants used.  
398 Congruent with previous findings for eye and hand selection, peak preferences align  
399 with acceleration information (Bakker et al. 2017, 2019; Rincon-Gonzalez et al. 2016).  
400 However, corticospinal excitability peaks around phases of maximum and minimum

## Corticospinal correlates of hand preference in motion

401 velocity. Future work could use multiple superimposed sinusoidal sled motions,  
402 whereby position, velocity and acceleration are decoupled, to test what information  
403 drives behavior and corticospinal excitability.

404 To conclude, we show that both choice behavior and corticospinal excitability  
405 modulate as a function of passive full body motion. This modulation may be driven by  
406 biomechanical costs predicted based on vestibular information, suggesting that body  
407 motion information biases hand selection processes even before a target is presented.

408

### 409 **Grants**

410 This research was supported by a grant from the Netherlands Organization for Scientific  
411 Research (NWO-VICI: 453-11-001).

412

### 413 **Disclosures**

414 No conflicts of interest, financial or otherwise, are declared by the authors.

415

### 416 **Data Availability Statement**

417 Upon publication, all data and code are available from the Donders Institute for Brain,  
418 Cognition and Behaviour repository at: <https://doi.org/10.34973/pm0w-wj61>

419

### 420 **References**

421 **Angelaki DE, Cullen KE.** Vestibular System: The Many Facets of a Multimodal Sense.  
422 *Annual Review of Neuroscience* 31: 125–150, 2008.

423 **Bakker RS, Selen LPJ, Medendorp WP.** Reference frames in the decisions of hand  
424 choice. *J Neurophysiol* 119: 1809–1817, 2018.

425 **Bakker RS, Selen LPJ, Medendorp WP.** Transformation of vestibular signals for the  
426 decisions of hand choice during whole body motion. *J Neurophysiol* 121: 2392–2400,  
427 2019.

428 **Bakker RS, Weijer RHA, van Beers RJ, Selen LPJ, Medendorp WP.** Decisions in  
429 motion: passive body acceleration modulates hand choice. *Journal of Neurophysiology*  
430 117: 2250–2261, 2017.

431 **Berens P.** CircStat: A MATLAB Toolbox for Circular Statistics. *Journal of Statistical*  
432 *Software* 31, 2009.

433 **Bernier P-M, Cieslak M, Grafton ST.** Effector selection precedes reach planning in the  
434 dorsal parietofrontal cortex. *Journal of Neurophysiology* 108: 57–68, 2012.

## Corticospinal correlates of hand preference in motion

- 435 **Bestmann S, Harrison LM, Blankenburg F, Mars RB, Haggard P, Friston KJ,**  
436 **Rothwell JC.** Influence of uncertainty and surprise on human corticospinal excitability  
437 during preparation for action. *Curr Biol* 18: 775–780, 2008.
- 438 **Bestmann S, Krakauer JW.** The uses and interpretations of the motor-evoked potential  
439 for understanding behaviour. *Exp Brain Res* 233: 679–689, 2015.
- 440 **Bresciani J-P, Gauthier GM, Vercher J-L, Blouin J.** On the nature of the vestibular  
441 control of arm-reaching movements during whole-body rotations. *Experimental Brain*  
442 *Research* 164: 431–441, 2005.
- 443 **Casula EP, Rocchi L, Hannah R, Rothwell JC.** Effects of pulse width, waveform and  
444 current direction in the cortex: A combined cTMS-EEG study. *Brain Stimulation* 11:  
445 1063–1070, 2018.
- 446 **Cisek P.** Cortical mechanisms of action selection: the affordance competition  
447 hypothesis. *Philos Trans R Soc Lond, B, Biol Sci* 362: 1585–1599, 2007.
- 448 **Cisek P, Kalaska JF.** Neural correlates of reaching decisions in dorsal premotor cortex:  
449 specification of multiple direction choices and final selection of action. *Neuron* 45: 801–  
450 814, 2005.
- 451 **Cisek P, Kalaska JF.** Neural mechanisms for interacting with a world full of action  
452 choices. *Annu Rev Neurosci* 33: 269–298, 2010.
- 453 **Cos I, Belanger N, Cisek P.** The influence of predicted arm biomechanics on decision  
454 making. *Journal of Neurophysiology* 105: 3022–3033, 2011.
- 455 **Cos I, Duque J, Cisek P.** Rapid prediction of biomechanical costs during action  
456 decisions. *J Neurophysiol* 112: 1256–1266, 2014.
- 457 **Dekleva BM, Kording KP, Miller LE.** Single reach plans in dorsal premotor cortex  
458 during a two-target task. *Nat Commun* 9: 3556, 2018.
- 459 **Dekleva BM, Ramkumar P, Wanda PA, Kording KP, Miller LE.** Uncertainty leads to  
460 persistent effects on reach representations in dorsal premotor cortex. *eLife* 5: e14316,  
461 2016.
- 462 **Derosiere G, Thura D, Cisek P, Duque J.** Motor cortex disruption delays motor  
463 processes but not deliberation about action choices. *Journal of Neurophysiology* 122:  
464 1566–1577, 2019.
- 465 **Duque J, Ivry RB.** Role of corticospinal suppression during motor preparation. *Cereb*  
466 *Cortex* 19: 2013–2024, 2009.
- 467 **Duque J, Lew D, Mazzocchio R, Olivier E, Ivry RB.** Evidence for two concurrent  
468 inhibitory mechanisms during response preparation. *J Neurosci* 30: 3793–3802, 2010.
- 469 **Kass RE, Raftery AE.** Bayes Factors. *Journal of the American Statistical Association* 90:  
470 773–795, 1995.

## Corticospinal correlates of hand preference in motion

- 471 **Kazennikov O, Solopova I, Talis V, Grishin A, Ioffe M.** TMS-responses during  
472 anticipatory postural adjustment in bimanual unloading in humans. *Neuroscience*  
473 *Letters* 383: 246–250, 2005.
- 474 **Keyser J, Medendorp WP, Selen LPJ.** Task-dependent vestibular feedback responses in  
475 reaching. *Journal of Neurophysiology* 118: 84–92, 2017.
- 476 **Klein-Flügge MC, Bestmann S.** Time-dependent changes in human corticospinal  
477 excitability reveal value-based competition for action during decision processing. *J*  
478 *Neurosci* 32: 8373–8382, 2012.
- 479 **Klein-Flügge MC, Nobbs D, Pitcher JB, Bestmann S.** Variability of human corticospinal  
480 excitability tracks the state of action preparation. *J Neurosci* 33: 5564–5572, 2013.
- 481 **Kontsevich LL, Tyler CW.** Bayesian adaptive estimation of psychometric slope and  
482 threshold. *Vision Research* 39: 2729–2737, 1999.
- 483 **Kuhn Y-A, Keller M, Lauber B, Taube W.** Surround inhibition can instantly be  
484 modulated by changing the attentional focus. *Sci Rep* 8: 1085, 2018.
- 485 **Mamolo CM, Roy EA, Bryden PJ, Rohr LE.** The effects of skill demands and object  
486 position on the distribution of preferred hand reaches. *Brain Cogn* 55: 349–351, 2004.
- 487 **Oliveira FTP, Diedrichsen J, Verstynen T, Duque J, Ivry RB.** Transcranial magnetic  
488 stimulation of posterior parietal cortex affects decisions of hand choice. *Proc Natl Acad*  
489 *Sci USA* 107: 17751–17756, 2010.
- 490 **Oostwoud Wijdenes L, van Beers RJ, Medendorp WP.** Vestibular modulation of  
491 visuomotor feedback gains in reaching. *Journal of Neurophysiology* 122: 947–957, 2019.
- 492 **Prins N.** The psi-marginal adaptive method: How to give nuisance parameters the  
493 attention they deserve (no more, no less). *Journal of Vision* 13: 3–3, 2013.
- 494 **Przybyla A, Coelho CJ, Akpinar S, Kirazci S, Sainburg RL.** Sensorimotor performance  
495 asymmetries predict hand selection. *Neuroscience* 228: 349–360, 2013.
- 496 **Ratcliff R, McKoon G.** The Diffusion Decision Model: Theory and Data for Two-Choice  
497 Decision Tasks. *Neural Computation* 20: 873–922, 2008.
- 498 **Reichenbach A, Bresciani J-P, Bühlhoff HH, Thielscher A.** Reaching with the sixth  
499 sense: Vestibular contributions to voluntary motor control in the human right parietal  
500 cortex. *NeuroImage* 124: 869–875, 2016.
- 501 **Rincon-Gonzalez L, Selen LPJ, Halfwerk K, Koppen M, Corneil BD, Medendorp WP.**  
502 Decisions in motion: vestibular contributions to saccadic target selection. *J Neurophysiol*  
503 116: 977–985, 2016.
- 504 **Rossi S, Hallett M, Rossini PM, Pascual-Leone A.** Safety, ethical considerations, and  
505 application guidelines for the use of transcranial magnetic stimulation in clinical  
506 practice and research. *Clinical Neurophysiology* 120: 2008–2039, 2009.



## Corticospinal correlates of hand preference in motion

- 507 **Sarwary AME, Selen LPJ, Medendorp WP.** Vestibular benefits to task savings in motor  
508 adaptation. *J Neurophysiol* 110: 1269–1277, 2013.
- 509 **Schutter DJLG, van Honk J.** A Standardized Motor Threshold Estimation Procedure for  
510 Transcranial Magnetic Stimulation Research: *The Journal of ECT* 22: 176–178, 2006.
- 511 **Schweighofer N, Xiao Y, Kim S, Yoshioka T, Gordon J, Osu R.** Effort, success, and  
512 nonuse determine arm choice. *J Neurophysiol* 114: 551–559, 2015.
- 513 **Selen LPJ, Beek PJ, Dieën JH van.** Can co-activation reduce kinematic variability? A  
514 simulation study. *Biol Cybern* 93: 373–381, 2005.
- 515 **Sohn YH, Kang SY, Hallett M.** Corticospinal disinhibition during dual action. *Exp Brain*  
516 *Res* 162: 95–99, 2005.
- 517 **Stoloff RH, Taylor JA, Xu J, Ridderikhoff A, Ivry RB.** Effect of reinforcement history on  
518 hand choice in an unconstrained reaching task. *Front Neurosci* 5: 41, 2011.
- 519 **Thura D, Cisek P.** Deliberation and commitment in the premotor and primary motor  
520 cortex during dynamic decision making. *Neuron* 81: 1401–1416, 2014.
- 521 **Wichmann FA, Hill NJ.** The psychometric function: I. Fitting, sampling, and goodness of  
522 fit. *Perception & Psychophysics* 63: 1293–1313, 2001.
- 523
- 524

## Corticospinal correlates of hand preference in motion

### 525 **Figure captions**

526 **Fig 1.** Experimental set-up. **A.** Illustration of the vestibular sled, touch screen and TMS  
527 coil. **B.** Sled position as a function of time. Target stimuli were presented, or TMS  
528 stimulation was applied at one of eight phases of whole-body motion (grey circles). **C.**  
529 Start locations of the index fingers (red circles), fixation cross and example target  
530 locations (yellow circles) for choice, catch and TMS trials. **D.** Predictions for the  
531 modulation of hand preference and corticospinal excitability as a function of sled phase.  
532 Based on Bakker et al. (2017) we expect maximum leftward deviation of the PSE at  
533 maximum leftward acceleration, i.e. at phase  $\frac{1}{2}\pi$  (green). MEP may (MEP2, purple) or  
534 may not (MEP1; black) modulate as a function of sled phase. The shaded area for MEP2  
535 indicates the predicted corticospinal excitability for a read-out in the time window from  
536 target presentation to movement initiation.

537

538 **Fig 2.** Choice behavior. **A.** Probability of right hand choice as a function of target angle  
539 (dots) fit by a cumulative Gaussian distribution (lines) for participant 9. The vertical  
540 black line indicates the PSE angle. Each panel shows a different sled phase. **B.** PSE as a  
541 function of sled phase for all participants (p1 to p19) and the circular mean phase with  
542 SEM (bottom right panel). PSEs were tested in two different sessions (dark blue:  $0, \frac{1}{2}\pi,$   
543  $\pi, 1\frac{1}{2}\pi$ ; light blue:  $\frac{1}{4}\pi, \frac{3}{4}\pi, 1\frac{1}{4}\pi, 1\frac{3}{4}\pi$ ). Lines show sinusoidal fits with a within  
544 participant coupled phase and session dependent amplitudes and offsets (eq. 2).

545

546 **Fig 3.** BIC model comparisons for the PSE (left panel) and MEP data (right panel).  $\Delta BIC$   
547 values per participant. A positive value indicates support for the sinusoidal model over  
548 the constant model.

549

550 **Fig 4.** Corticospinal excitability. **A.** Time as a function of average EMG response of TLAT  
551 for participant 9. Each panel shows a different sled phase. **B.** Mean MEP amplitude as a  
552 function of sled phase for all participants (panels 1:19) and the circular mean phase  
553 with SEM (bottom right panel). MEPs for each phase were tested in two different  
554 sessions (dark red:  $0, \frac{1}{2}\pi, \pi, 1\frac{1}{2}\pi$ ; orange:  $\frac{1}{4}\pi, \frac{3}{4}\pi, 1\frac{1}{4}\pi, 1\frac{3}{4}\pi$ ). Lines show the sinusoid  
555 fits with a within participant coupled phase and session dependent amplitudes and  
556 offsets.

557

## Corticospinal correlates of hand preference in motion

558 **Fig 5.** Correlation between PSE and MEP. **A.** Estimated PSE (blue diamonds) and MEP (red  
559 squares) phase in radians for all participants. Lines indicate the circular mean phase. **B.**  
560 Circular phase difference between PSE and MEP for all participants (circles) and the  
561 across participants mean phase difference (line) in radians.

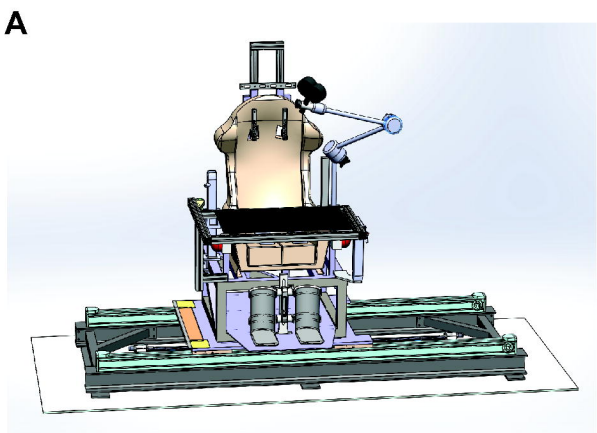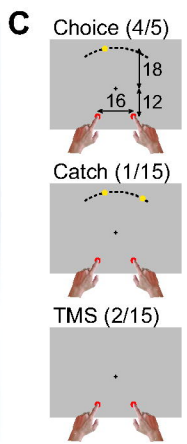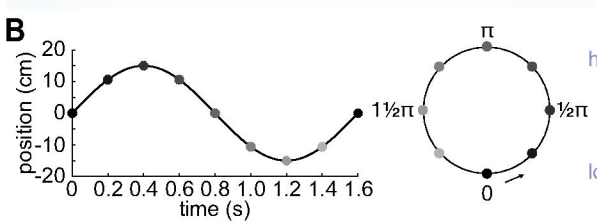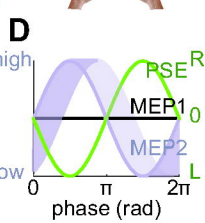

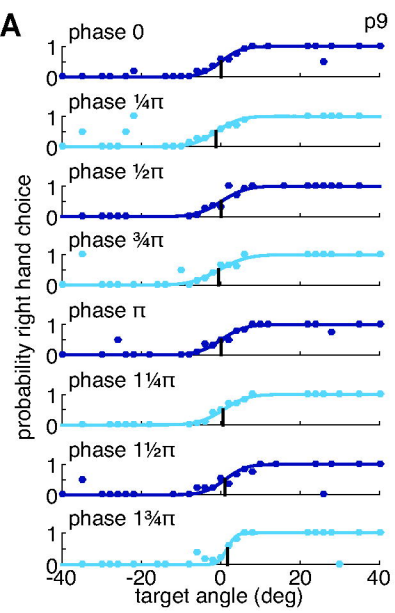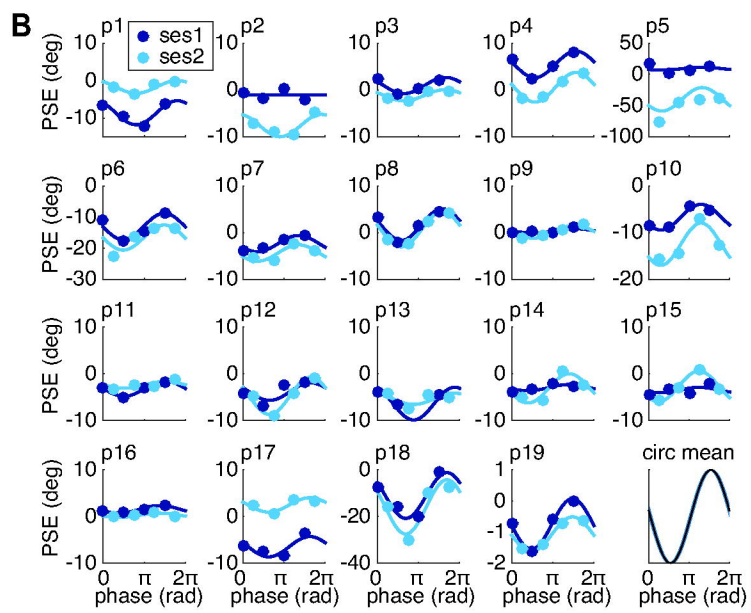

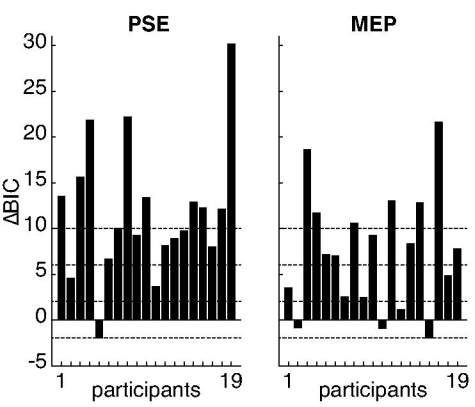



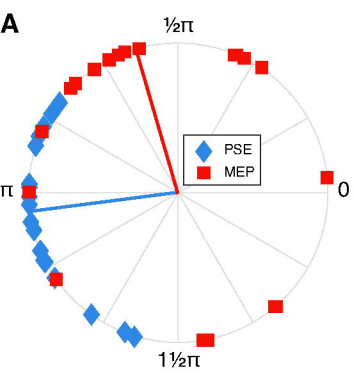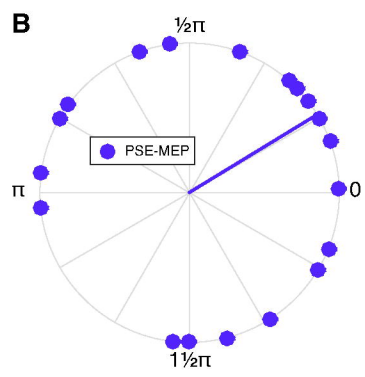

Source: http://biorxiv.org/content/10.1101/2021.01.05.425205v1.full.pdf
